# Supplementary material
Source: publisher figshare collection journal article supplement (https://geolsoc.figshare.com/ndownloader/files/5424428)
Supplement: Supplementary file 1 [file 5424428]

Table B2. Estimated model and parameters of paleo TS outputs (n=20, fascicle density)
window_no.	start_slide_no.	start_depth_m	start_age_years	end_slide_no.	end_depth_m	end_age_years	mid_depth_m	mid_age_years	best_model	logL	K	AICc	Akaike.wt	mstep	vstep	theta1	theta2	omega	shift1	shift2	ESD_1000years	ESD_1000years*
1	393-b	157.12	238366.07	331-c	134.10	201997.99	145.61	220182.03	Punc-1	7.753423	4	-4.840179	0.399			3.11065458	3.35115939	0.01578284	17		3.16E-02
2	391-a	156.28	237039.98	331-a	133.68	201326.64	144.98	219183.31	Punc-1	9.911106	4	-9.155546	0.769			3.092185141	3.325507481	0.009902637	16		1.98E-02
3	389-c	156.03	236653.21	329-a	133.15	200500.37	144.59	218576.79	Punc-1	10.300093	4	-9.93352	0.778			3.07651138	3.29244586	0.01047873	15		2.10E-02
4	389-a	155.54	235879.66	327-c	132.70	199777.38	144.12	217828.52	Punc-1	10.46796	4	-10.269254	0.811			3.06714211	3.28302091	0.01033941	14		2.07E-02
5	387-a	154.77	234664.08	327-a	132.26	199083.43	143.51	216873.76	Punc-1	10.218801	4	-9.7709352	0.779			3.0392938	3.246746	0.0111293	13		2.23E-02
6	385-c	154.32	233945.78	325-a	131.63	198095.77	142.98	216020.78	Punc-1	10.841705	4	-11.016744	0.842			3.012445768	3.225029678	0.009480411	12		1.90E-02
7	385-a	153.90	233282.74	323-c	131.18	197382.47	142.54	215332.60	Punc-1	6.3835889	4	-2.100511	0.784			3.12800582	2.5406061	0.01811484	20		3.62E-02
8	381-a	152.27	230708.72	323-a	130.73	196669.16	141.50	213688.94	Punc-1	6.84574888	4	-3.024831	0.891			3.13410486	2.5968527	0.01727078	19		3.45E-02
9	367-b	147.50	223171.33	321-c	130.17	195791.24	138.84	209481.28	Punc-1	10.1412264	4	-9.6157861	0.97			3.1542262	2.56910515	0.01204324	18		2.41E-02
10	353-b	142.50	215270.06	319-c	129.20	194254.88	135.85	204762.47	Punc-1	10.008989	4	-9.3513121	0.962			3.15834574	2.5320754	0.01274672	17		2.55E-02
11	353-a	142.25	214874.99	319-a	128.68	193431.83	135.47	204153.41	Punc-1	9.551809	4	-8.4369504	0.966			3.16858573	2.48636813	0.01434714	16		2.87E-02
12	351-d	142.00	214479.93	315-b	127.74	191950.34	134.87	203215.14	Punc-1	8.327106	4	-5.987545	0.81			3.16357323	2.44190702	0.01802749	15		3.61E-02
13	351-c	141.75	214084.87	313-c	127.13	190986.83	134.44	202535.85	Punc-1	7.76048	4	-4.854293	0.631			3.17255462	2.40724261	0.02017978	14		4.04E-02
14	347-c	140.11	211488.74	313-a	126.70	190302.05	133.40	200895.39	Punc-1	8.459034	4	-6.251401	0.654			3.193493	2.376457	0.019761	13		3.95E-02
15	347-a	139.61	210698.61	311-b	126.30	189669.95	132.95	200184.28	URW	4.079828	1	-5.9374347	0.408		2.91E-05							2.91E-02
16	345-a	139.11	209908.48	309-d	125.90	189037.85	132.50	199473.17	URW	4.225827	1	-6.229431	0.401		2.96E-05							2.96E-02
17	343-b	138.29	208610.42	309-b	125.40	188247.72	131.84	198429.07	SGS	15.261072	7	-7.188811	0.33	-1.77E-04	3.77E-05	3.28E+00	2.22E+00	3.55E-03	8	14	7.11E-03	6.90E-02
18	341-b	137.71	207707.42	307-c	124.93	187510.27	131.32	197608.84	GRW	7.975609	2	-11.24534	0.399	-6.71E-05	2.01E-05							2.46E-02
19	337-a	136.06	205096.53	307-a	124.63	187036.19	130.35	196066.36	SGS	18.649153	7	-13.964973	0.522	-1.18E-04	2.96E-05	3.41E+00	2.23E+00	0.00E+00	3	12	0.00E+00	4.35E-02
20	335-c	135.57	204321.90	305-c	124.27	186456.77	129.92	195389.33	URW	7.581269	1	-12.940317	0.504		2.26E-05							2.26E-02
21	335-a	135.11	203598.90	305-a	123.77	185666.64	129.44	194632.77	URW	6.547581	1	-10.872939	0.381		2.60E-05							2.60E-02
22	331-c	134.10	201997.99	301-c	122.73	184033.71	128.42	193015.85	URW	6.574244	1	-10.926265	0.434		2.72E-05							2.72E-02
23	331-a	133.68	201326.64	301-a	122.23	183240.76	127.95	192283.70	URW	6.317113	1	-10.412004	0.407		2.63E-05							2.63E-02
24	329-a	133.15	200500.37	299-b	121.53	182127.16	127.34	191313.76	Punc-1	10.7951212	4	-10.923576	0.349			3.04140409	2.34336363	0.01570243	3		3.14E-02
25	327-c	132.70	199777.38	295-d	120.49	180483.27	126.59	190130.32	SGS	17.634574	7	-11.935815	0.428	-5.17E-05	0.00E+00	2.76E+00	2.40E+00	1.90E-02	4	14	3.80E-02	2.67E-03
26	327-a	132.26	199083.43	295-b	120.08	179846.92	126.17	189465.18	SGS	24.22676	7	-25.12019	0.712	-4.29E-05	0.00E+00	2.57E+00	2.37E+00	1.57E-03	4	13	3.13E-03	1.84E-03
27	325-a	131.63	198095.77	293-b	119.55	178998.47	125.59	188547.12	SGS	24.16049	7	-24.98764	0.545	-4.29E-05	0.00E+00	2.58E+00	2.38E+00	2.08E-03	3	12	4.15E-03	1.84E-03
28	323-c	131.18	197382.47	291-b	118.84	177884.86	125.01	187633.67	SGS	24.48071	7	-25.62809	0.315	-3.64751E-05	0	2.467327715	2.39076408	0.001595967	3	11	3.19E-03	1.33E-03
29	323-a	130.73	196669.16	289-b	118.00	176559.15	124.37	186614.15	Punc-1	20.13384	4	-29.60102	0.862			2.246177036	2.424838601	0.003741007	11		7.48E-03
30	321-c	130.17	195791.24	287-d	117.50	175763.72	123.84	185777.48	Punc-1	22.39555	4	-34.12444	0.981			2.226070509	2.430169334	0.001818891	10		3.64E-03
31	319-c	129.20	194254.88	287-b	117.12	175164.31	123.16	184709.60	Punc-1	17.90183	4	-25.13699	0.739			2.21569913	2.45726483	0.005127696	9		1.03E-02
32	319-a	128.68	193431.83	285-c	116.71	174510.41	122.69	183971.12	Punc-1	17.691123	4	-24.71558	0.882			2.215079851	2.46241334	0.005143946	8		1.03E-02
33	315-b	127.74	191950.34	285-a	116.22	173747.53	121.98	182848.94	Punc-1	17.60545	4	-24.54423	0.846			2.217872553	2.465609721	0.005088574	7		1.02E-02
34	313-c	127.13	190986.83	279-a	113.67	169715.16	120.40	180351.00	Punc-1	17.96775	4	-25.26883	0.872			2.329590492	2.549322363	0.003301596	14		6.60E-03
35	313-a	126.70	190302.05	277-a	113.16	168897.79	119.93	179599.92	Punc-1	19.01139	4	-27.35612	0.966			2.343287274	2.555834421	0.002045911	13		4.09E-03
36	311-b	126.30	189669.95	275-b	112.50	167862.45	119.40	178766.20	Punc-1	19.89115	4	-29.11562	0.984			2.365031127	2.576579979	0.001064587	13		2.13E-03
37	309-d	125.90	189037.85	273-a	111.74	166654.61	118.82	177846.23	Punc-1	18.582256	4	-26.49785	0.981			2.37149173	2.589655471	0.001324289	12		2.65E-03
38	309-b	125.40	188247.72	269-a	110.68	164993.84	118.04	176620.78	Punc-1	18.03491	4	-25.40315	0.977			2.39E+00	2.60E+00	4.95E-04	11		9.90E-04
39	307-c	124.93	187510.27	263-d	109.47	163081.43	117.20	175295.85	Punc-1	16.309138	4	-21.95161	0.899			2.400825515	2.625396023	0.002462402	10		4.92E-03
40	307-a	124.63	187036.19	261-b	108.61	161722.61	116.62	174379.40	Punc-1	13.651743	4	-16.63682	0.763			2.387283884	2.599930791	0.005927495	9		1.19E-02
41	305-c	124.27	186456.77	259-c	107.50	159961.18	115.88	173208.98	URW	6.961813	1	-11.701403	0.63		1.37E-05							1.37E-02
42	305-a	123.77	185666.64	259-a	106.94	159076.71	115.35	172371.68	URW	5.823584	1	-9.424946	0.588		1.66E-05							1.66E-02
43	301-c	122.73	184033.71	251-c	105.22	156364.34	113.98	170199.03	URW	4.844339	1	-7.466455	0.571		1.96E-05							1.96E-02
44	301-a	122.23	183240.76	251-a	104.70	155538.83	113.47	169389.79	URW	1.501075	1	-0.77992716	0.45		3.22E-05							3.22E-02
45	299-b	121.53	182127.16	249-b	103.84	154182.64	112.69	168154.90	URW	1.792162	1	-1.3621013	0.423		3.15E-05							3.15E-02
46	295-d	120.49	180483.27	245-c	103.10	153003.35	111.79	166743.31	GRW	2.861908	2	-1.0179329	0.386	-6.44E-05	2.59E-05							3.01E-02
47	295-b	120.08	179846.92	245-a	102.50	152059.92	111.29	165953.42	SGS	12.68053	7	-2.02772701	0.619	-8.64E-05	3.32E-05	2.56E+00	1.18E+00	8.72E-04	10	17	1.74E-03	4.07E-02
48	293-b	119.55	178998.47	243-b	101.83	151003.06	110.69	165000.76	SGS	13.100056	7	-2.8667787	0.721	-8.65E-05	3.32E-05	2.58E+00	1.19E+00	4.20E-04	9	16	8.41E-04	4.06E-02
49	291-b	118.84	177884.86	241-d	101.16	149946.20	110.00	163915.53	GRW	1.533597128	2	1.638688	0.449	-7.31E-05	2.93E-05							3.47E-02
50	289-b	118.00	176559.15	241-b	100.78	149342.28	109.39	162950.72	GRW	1.5668432	2	1.572196	0.499	-7.13E-05	3.03E-05							3.54E-02
51	287-d	117.50	175763.72	239-a	99.70	147631.18	108.60	161697.45	GRW	1.8743824	2	0.9571175	0.519	-7.45E-05	2.94E-05							3.49E-02
52	287-b	117.12	175164.31	235-c	99.06	146624.65	108.09	160894.48	URW	0.1744044	1	1.873413	0.559		3.73E-05							3.73E-02
53	285-c	116.71	174510.41	235-a	98.52	145769.10	107.61	160139.76	URW	-0.01170137	1	2.245625	0.579		3.72E-05							3.72E-02
54	285-a	116.22	173747.53	231-c	97.12	143563.35	106.67	158655.44	URW	-0.01508489	1	2.252392	0.522		3.70E-05							3.70E-02
55	279-a	113.67	169715.16	231-a	96.54	142643.34	105.11	156179.25	URW	0.2447594	1	1.732703	0.553		3.74E-05							3.74E-02
56	277-a	113.16	168897.79	229-b	95.48	140965.67	104.32	154931.73	URW	0.02110432	1	2.180014	0.39		3.83E-05							3.83E-02
57	275-b	112.50	167862.45	225-c	94.73	139775.07	103.61	153818.76	GRW	1.8599293	2	0.9860237	0.499	-6.94E-05	2.92E-05							3.41E-02
58	273-a	111.74	166654.61	223-c	93.63	138043.28	102.68	152348.95	GRW	1.8384918	2	1.028899	0.53	-6.59E-05	2.96E-05							3.39E-02
59	269-a	110.68	164993.84	219-c	92.50	136257.38	101.59	150625.61	Punc-1	6.3962421	4	-2.125817	0.759			2.01714488	1.20691822	0.02504139	5		5.01E-02
60	263-d	109.47	163081.43	219-a	91.96	135408.92	100.72	149245.18	Punc-1	7.416813	4	-4.1669591	0.672			1.91619145	1.22270801	0.02219627	4		4.44E-02
61	261-b	108.61	161722.61	215-c	91.33	134401.38	99.97	148061.99	Punc-1	7.8326067	4	-4.9985467	0.76			1.85382234	1.22115384	0.02146567	3		4.29E-02
62	259-c	107.50	159961.18	215-a	90.82	133605.95	99.16	146783.57	URW	2.6263347	1	-3.0304472	0.704		3.05E-05							3.05E-02
63	259-a	106.94	159076.71	213-b	90.08	132439.32	98.51	145758.02	Punc-1	13.666643	4	-16.666619	0.93			1.10119398	1.32889413	0.01054163	9		2.11E-02
64	251-c	105.22	156364.34	211-c	89.48	131484.80	97.35	143924.57	Punc-1	14.750037	4	-18.833407	0.859			1.075352341	1.333279719	0.009522456	8		1.90E-02
65	251-a	104.70	155538.83	211-a	89.18	131007.54	96.94	143273.19	Punc-1	15.005918	4	-19.345168	0.902			1.05027786	1.342785568	0.009331211	7		1.87E-02
66	249-b	103.84	154182.64	207-c	88.71	130265.14	96.28	142223.89	Punc-1	14.999971	4	-19.333275	0.754			1.060907735	1.346654321	0.009397143	6		1.88E-02
67	245-c	103.10	153003.35	207-a	88.20	129023.66	95.65	141013.51	Punc-1	16.136724	4	-21.606782	0.846			1.015605462	1.341372809	0.008162119	5		1.63E-02
68	245-a	102.50	152059.92	205-a	87.84	128860.94	95.17	140460.43	Punc-1	18.897276	4	-27.127886	0.993			0.918250718	1.35138479	0.005326752	4		1.07E-02
69	243-b	101.83	151003.06	203-c	87.50	128318.53	94.67	139660.80	Punc-1	18.919659	4	-27.17265	0.99			0.929135304	1.348106765	0.005462265	3		1.09E-02
70	241-d	101.16	149946.20	203-a	87.11	127688.78	94.14	138817.49	Punc-1	19.335612	4	-28.00456	0.568			1.16051852	1.35575104	0.00507848	3		1.02E-02
71	241-b	100.78	149342.28	201-c	86.66	126954.06	93.72	138148.17	Stasis	19.8499	2	-34.99391	0.615			1.352200849		0.004725472			9.45E-03
72	239-a	99.70	147631.18	201-b	86.40	126534.22	93.05	137082.70	Stasis	20.52971	2	-36.35354	0.759			1.356383025		0.004084215			8.17E-03
73	235-c	99.06	146624.65	199-c	85.49	125064.79	92.27	135844.72	Stasis	20.2846	2	-35.86331	0.838			1.354900345		0.004251815			8.50E-03
74	235-a	98.52	145769.10	199-a	84.84	124015.19	91.68	134892.14	Punc-1	20.40041	4	-30.13416	0.745			1.357060226	1.073170944	0.004242066	20		8.48E-03
75	231-c	97.12	143563.35	197-a	84.38	123280.47	90.75	133421.91	Punc-1	20.83634	4	-31.00601	0.98			1.352530911	1.057070098	0.003958158	19		7.92E-03
76	231-a	96.54	142643.34	195-c	83.18	121338.72	89.86	131991.03	Punc-1	21.27909	4	-31.89152	0.99			1.357094579	1.054078798	0.003694241	18		7.39E-03
77	229-b	95.48	140965.67	195-a	82.86	120813.92	89.17	130889.80	Punc-1	23.47353	4	-36.2804	0.996			1.367325464	1.062920662	0.002351844	17		4.70E-03
78	225-c	94.73	139775.07	193-a	82.22	119784.51	88.47	129779.79	Punc-1	23.717358	4	-36.76805	0.995			1.372813574	1.047906554	0.002290463	16		4.58E-03
79	223-c	93.63	138043.28	191-c	81.03	117862.94	87.33	127953.11	Punc-1	23.932127	4	-37.19759	0.995			1.368830547	1.05367225	0.002355279	15		4.71E-03
80	219-c	92.50	136257.38	191-a	80.51	117015.19	86.50	126636.29	Punc-1	23.940609	4	-37.214551	0.996			1.361205877	1.037882053	0.002426742	14		4.85E-03
81	219-a	91.96	135408.92	189-b	79.77	115828.34	85.87	125618.63	Punc-1	26.867371	4	-43.068075	0.994			1.374819813	1.043401594	0.001107843	13		2.22E-03
82	215-c	91.33	134401.38	187-c	79.04	114641.49	85.18	124521.44	Punc-1	26.211774	4	-41.75688	0.993			1.374749701	1.034739111	0.001363442	12		2.73E-03
83	215-a	90.82	133605.95	187-a	78.55	113850.26	84.69	123728.10	Punc-1	26.332283	4	-41.997899	0.994			1.370750564	1.037581932	0.001372419	11		2.74E-03
84	213-b	90.08	132439.32	185-c	78.06	113059.03	84.07	122749.17	Punc-1	25.423293	4	-40.179919	0.994			1.369108325	1.046230831	0.001803984	10		3.61E-03
85	211-c	89.48	131484.80	185-a	77.50	112154.76	83.49	121819.78	Punc-1	26.387263	4	-42.10786	0.996			1.356938365	1.050284788	0.001416732	9		2.83E-03
86	211-a	89.18	131007.54	183-b	76.39	110364.47	82.79	120686.01	Punc-1	26.562756	4	-42.45885	0.997			1.350671144	1.052461731	0.001390811	8		2.78E-03
87	207-c	88.71	130265.14	181-c	75.51	108932.23	82.11	119598.69	Punc-1	27.448718	4	-44.23077	0.993			1.36543901	1.04902726	0.00108759	7		2.18E-03
88	207-a	88.20	129023.66	177-d	73.64	104168.24	80.92	116595.95	Punc-1	31.04322	4	-51.41977	0.998			1.33614	1.045307	0	6		0.00E+00
89	205-a	87.84	128860.94	177-b	73.16	102556.10	80.50	115708.52	Punc-1	31.04308	4	-51.41949	0.993			1.347123777	1.042146736	0.000113272	5		2.27E-04
90	203-c	87.50	128318.53	175-c	72.25	99456.06	79.88	113887.30	Punc-1	26.99039	4	-43.31412	0.904			1.333951814	1.031945779	0.001519865	4		3.04E-03
91	203-a	87.11	127688.78	175-a	71.68	97529.12	79.40	112608.95	URW	19.55909	1	-36.89596	0.425		2.66E-06							2.66E-03
92	201-c	86.66	126954.06	173-c	70.80	94738.56	78.73	110846.31	Punc-1	24.53992	4	-38.41317	0.662			1.056014983	0.870518093	0.002784687	18		5.57E-03
93	201-b	86.40	126534.22	173-b	70.16	93562.07	78.28	110048.15	Punc-1	29.57307	4	-48.47947	0.976			1.04E+00	9.03E-01	8.68E-04	17		1.74E-03
94	199-c	85.49	125064.79	171-d	69.88	93039.19	77.68	109051.99	Punc-1	29.73321	4	-48.79976	0.972			1.04E+00	9.05E-01	9.48E-04	16		1.90E-03
95	199-a	84.84	124015.19	171-b	69.63	92581.66	77.23	108298.43	Punc-1	27.75773	4	-44.8488	0.898			1.040014703	0.925411629	0.001625328	15		3.25E-03
96	197-a	84.38	123280.47	169-d	68.95	91339.81	76.67	107310.14	Punc-1	27.42399	4	-44.18131	0.859			1.03939304	0.933197791	0.001706391	14		3.41E-03
97	195-c	83.18	121338.72	169-b	68.42	90359.41	75.80	105849.06	Punc-1	27.76332	4	-44.85997	0.848			1.035221985	0.935075367	0.001625829	13		3.25E-03
98	195-a	82.86	120813.92	167-a	67.85	89313.64	75.36	105063.78	Punc-1	27.73647	4	-44.80628	0.822			1.049658592	0.95129864	0.001672727	10		3.35E-03
99	193-a	82.22	119784.51	165-c	67.50	88660.03	74.86	104222.27	Punc-1	27.76096	4	-44.85526	0.815			1.035231237	0.938103382	0.001659197	11		3.32E-03
100	191-c	81.03	117862.94	165-a	67.15	88015.57	74.09	102939.26	Punc-1	28.982	4	-47.29733	0.914			1.069472687	0.956048853	0.001258932	7		2.52E-03
101	191-a	80.51	117015.19	163-b	66.31	86791.42	73.41	101903.31	Punc-1	26.56195	4	-42.45723	0.852			1.040892349	0.933977289	0.002198817	9		4.40E-03
102	189-b	79.77	115828.34	159-d	65.65	85949.98	72.71	100889.16	Punc-1	28.03415	4	-45.40162	0.959			1.092337807	0.944611282	0.001716164	5		3.43E-03
103	187-c	79.04	114641.49	159-b	65.09	85241.40	72.06	99941.45	Punc-1	28.19635	4	-45.72604	0.942			1.102097468	0.944547995	0.001679749	4		3.36E-03
104	187-a	78.55	113850.26	155-d	64.46	84444.25	71.50	99147.25	Punc-1	27.82611	4	-44.98556	0.8			1.03315983	0.92849245	0.00186531	6		3.73E-03
105	185-c	78.06	113059.03	155-b	63.93	83779.95	71.00	98419.49	Stasis	25.10867	2	-45.51146	0.545			0.94971191		0.003023091			6.05E-03
106	185-a	77.50	112154.76	153-d	63.27	82938.51	70.38	97546.64	Stasis	26.62652	2	-48.54715	0.788			0.939683404		0.002377781			4.76E-03
107	183-b	76.39	110364.47	153-b	62.74	82274.22	69.57	96319.34	Stasis	27.16308	2	-49.62028	0.824			0.935672476		0.002158615			4.32E-03
108	181-c	75.51	108932.23	151-a	62.12	81483.79	68.81	95208.01	Stasis	27.59917	2	-50.49246	0.874			0.933338782		0.001984343			3.97E-03
109	177-d	73.64	104168.24	147-d	61.71	80959.68	67.67	92563.96	Stasis	27.3412	2	-49.97651	0.718			0.926160752		0.002076695			4.15E-03
110	177-b	73.16	102556.10	147-b	61.22	80348.23	67.19	91452.16	Stasis	27.4487	2	-50.19153	0.857			0.931832316		0.002048929			4.10E-03
111	175-c	72.25	99456.06	143-d	60.64	79605.74	66.44	89530.90	Stasis	27.95986	2	-51.21384	0.82			0.94217619		0.00181348			3.63E-03
112	175-a	71.68	97529.12	143-b	60.16	78994.29	65.92	88261.70	Stasis	27.38639	2	-50.0669	0.726			0.946998013		0.001966242			3.93E-03
113	173-c	70.80	94738.56	139-b	59.09	77640.35	64.94	86189.45	Punc-1	29.73748	4	-48.80829	0.661			0.93201462	1.022833061	0.001111241	17		2.22E-03
114	173-b	70.16	93562.07	135-d	58.53	76941.54	64.35	85251.81	Punc-1	29.8039	4	-48.94113	0.809			0.936434173	1.038311507	0.001126017	17		2.25E-03
115	171-d	69.88	93039.19	135-b	58.02	76286.41	63.95	84662.80	Punc-1	28.59877	4	-46.53087	0.533			0.926489464	1.003076177	0.001474835	15		2.95E-03
116	171-b	69.63	92581.66	131-d	57.50	75631.28	63.56	84106.47	Punc-1	28.81468	4	-46.96269	0.564			0.922375654	0.996822772	0.001471252	14		2.94E-03
117	169-d	68.95	91339.81	131-b	57.02	75028.14	62.99	83183.98	Stasis	24.29711	2	-43.88834	0.782			0.942761469		0.003469107			6.94E-03
118	169-b	68.42	90359.41	129-d	56.45	74295.76	62.43	82327.58	Stasis	24.57095	2	-44.43601	0.712			0.940638199		0.003359647			6.72E-03
119	167-a	67.85	89313.64	129-b	56.00	73735.71	61.93	81524.67	Stasis	24.09632	2	-43.48676	0.83			0.938476088		0.003669879			7.34E-03
120	165-c	67.50	88660.03	127-d	55.77	73434.14	61.63	81047.09	Stasis	24.57832	2	-44.45076	0.717			0.935934339		0.003394577			6.79E-03
121	165-a	67.15	88015.57	127-b	55.29	72831.00	61.22	80423.29	Stasis	24.7636	2	-44.82132	0.695			0.936328348		0.003321075			6.64E-03
122	163-b	66.31	86791.42	123-d	54.27	71538.56	60.29	79164.99	Punc-1	26.27745	4	-41.88824	0.551			0.943873343	0.807428862	0.002625707	19		5.25E-03
123	159-d	65.65	85949.98	123-b	53.62	70720.02	59.63	78335.00	Stasis	22.88461	2	-41.06333	0.471			0.928028807		0.004280619			8.56E-03
124	159-b	65.09	85241.40	121-d	53.25	70246.13	59.17	77743.76	Punc-1	26.08465	4	-41.50263	0.495			0.973149514	0.895017855	0.002579248	11		5.16E-03
125	155-d	64.46	84444.25	121-b	52.74	69599.91	58.60	77022.08	Stasis	23.40585	2	-42.10583	0.563			0.930973865		0.003842805			7.69E-03
126	155-b	63.93	83779.95	119-c	50.61	66907.76	57.27	75343.86	Punc-1	27.09449	4	-43.52231	0.646			0.982164227	0.896422195	0.002121315	9		4.24E-03
127	153-d	63.27	82938.51	117-d	50.41	66656.12	56.84	74797.32	Stasis	22.38459	2	-40.06331	0.497			0.936602031		0.004408918			8.82E-03
128	153-b	62.74	82274.22	117-b	49.95	66068.96	56.35	74171.59	Punc-1	25.39695	4	-40.12724	0.568			0.997767357	0.905260525	0.002804101	7		5.61E-03
129	151-a	62.12	81483.79	115-d	49.42	65397.92	55.77	73440.85	Punc-1	28.61957	4	-46.57247	0.957			1.027069968	0.904046774	0.001543623	6		3.09E-03
130	147-d	61.71	80959.68	115-b	48.96	64810.76	55.33	72885.22	Punc-1	27.18451	4	-43.70235	0.891			1.038311559	0.911370761	0.002018404	5		4.04E-03
131	147-b	61.22	80348.23	113-d	48.43	64139.72	54.83	72243.97	Punc-1	26.49875	4	-42.33084	0.715			1.040645839	0.915887784	0.002276939	4		4.55E-03
132	143-d	60.64	79605.74	113-b	48.03	63636.44	54.33	71621.09	Punc-1	25.84062	4	-41.01456	0.616			1.053637336	0.911228932	0.002583235	3		5.17E-03
133	143-b	60.16	78994.29	111-d	47.50	62965.40	53.83	70979.85	Stasis	24.10137	2	-43.49685	0.906			0.917376423		0.003394794			6.79E-03
134	139-b	59.09	77640.35	111-b	47.13	62491.51	53.11	70065.93	Stasis	25.18369	2	-45.6615	0.871			0.906733385		0.002920835			5.84E-03
135	135-d	58.53	76941.54	107-d	46.48	61672.97	52.51	69307.26	Stasis	25.06796	2	-45.43004	0.841			0.905869698		0.002998246			6.00E-03
136	135-b	58.02	76286.41	107-b	45.97	61026.75	51.99	68656.58	Stasis	25.3877	2	-46.06952	0.875			0.903133756		0.002862323			5.72E-03
137	131-d	57.50	75631.28	105-b	44.98	59777.40	51.24	67704.34	Stasis	25.73457	2	-46.76327	0.812			0.904579944		0.002684879			5.37E-03
138	131-b	57.02	75028.14	103-d	44.44	59088.10	50.73	67058.12	Stasis	26.0118	2	-47.31772	0.842			0.901639115		0.002481952			4.96E-03
139	129-d	56.45	74295.76	103-b	43.96	58484.96	50.20	66390.36	Stasis	26.14727	2	-47.58867	0.795			0.90257446		0.00245339			4.91E-03
140	129-b	56.00	73735.71	97-d	42.50	56632.47	49.25	65184.09	Stasis	26.26655	2	-47.82722	0.644			0.896955632		0.002331406			4.66E-03
141	127-d	55.77	73434.14	97-b	42.02	56021.01	48.89	64727.57	Stasis	26.95969	2	-49.2135	0.668			0.901208048		0.002069901			4.14E-03
142	127-b	55.29	72831.00	95-d	41.47	55322.20	48.38	64076.60	Punc-1	33.08828	4	-55.50989	0.801			9.45E-01	8.76E-01	2.44E-04	10		4.88E-04
143	123-d	54.27	71538.56	95-b	40.95	54667.07	47.61	63102.82	Punc-1	30.90653	4	-51.14639	0.876			0.950367004	0.865946678	0.000772319	9		1.54E-03
144	123-b	53.62	70720.02	93-d	40.43	54011.94	47.03	62365.98	Punc-1	31.0919	4	-51.51712	0.821			0.945700532	0.86469563	0.000792217	8		1.58E-03
145	121-d	53.25	70246.13	93-b	39.93	53378.65	46.59	61812.39	Punc-1	31.02564	4	-51.38461	0.821			0.947617871	0.863027579	0.000887241	7		1.77E-03
146	121-b	52.74	69599.91	85-c	37.74	50605.26	45.24	60102.58	Punc-1	29.77657	4	-48.88648	0.92			0.96259643	0.85493548	0.00128411	6		2.57E-03
147	119-c	50.61	66907.76	85-a	37.23	49939.00	43.92	58423.38	Punc-1	30.22073	4	-49.77479	0.573			0.94279993	0.859615742	0.001180324	5		2.36E-03
148	117-d	50.41	66656.12	83-c	36.76	49085.05	43.59	57870.59	Punc-1	28.36975	4	-46.07284	0.476			0.965477065	0.867697044	0.001778469	4		3.56E-03
149	117-b	49.95	66068.96	83-a	36.25	48170.10	43.10	57119.53	Punc-1	29.76393	4	-48.8612	0.801			1.00465733	0.868660811	0.001331261	3		2.66E-03
150	115-d	49.42	65397.92	81-c	35.79	47346.65	42.61	56372.29	Stasis	27.28862	2	-49.87135	0.576			0.878102933		0.002173568			4.35E-03
151	115-b	48.96	64810.76	81-a	35.30	46462.20	42.13	55636.48	Stasis	29.0339	2	-53.36193	0.535			0.871153753		0.001601156			3.20E-03
152	113-d	48.43	64139.72	75-d	34.80	45547.25	41.61	54843.49	Punc-1	31.68562	4	-52.70457	0.611			8.57E-01	9.27E-01	8.83E-04	15		1.77E-03
153	113-b	48.03	63636.44	75-b	34.36	44754.29	41.19	54195.37	Stasis	26.48316	2	-48.26045	0.759			0.87033107		0.00258106			5.16E-03
154	111-d	47.50	62965.40	73-d	33.89	43900.34	40.69	53432.87	Punc-1	28.60539	4	-46.54412	0.582			0.878809693	0.756971297	0.001848026	19		3.70E-03
155	111-b	47.13	62491.51	73-b	33.51	43229.38	40.32	52860.45	Stasis	24.97522	2	-45.24457	0.83			0.869299112		0.003306426			6.61E-03
156	107-d	46.48	61672.97	71-d	33.04	42375.43	39.76	52024.20	Stasis	25.10363	2	-45.50137	0.862			0.866977847		0.003140228			6.28E-03
157	107-b	45.97	61026.75	71-b	32.70	41765.46	39.34	51396.11	Stasis	24.5267	2	-44.34753	0.874			0.871006967		0.003409769			6.82E-03
158	105-b	44.98	59777.40	69-d	32.28	41010.88	38.63	50394.14	Stasis	24.49805	2	-44.29021	0.872			0.868263751		0.003449887			6.90E-03
159	103-d	44.44	59088.10	69-b	31.87	40263.57	38.15	49675.83	Stasis	24.50526	2	-44.30463	0.852			0.868086364		0.003505053			7.01E-03
160	103-b	43.96	58484.96	67-a	30.91	38529.81	37.44	48507.39	Stasis	24.5285	2	-44.35111	0.864			0.868438768		0.003482195			6.96E-03
161	97-d	42.50	56632.47	63-c	29.95	36796.06	36.23	46714.26	Stasis	22.08555	2	-39.46522	0.581			0.875163412		0.004878775			9.76E-03
162	97-b	42.02	56021.01	63-a	29.49	35959.07	35.75	45990.04	Stasis	22.09689	2	-39.48789	0.627			0.872297663		0.004891039			9.78E-03
163	95-d	41.47	55322.20	61-c	29.01	35092.19	35.24	45207.20	Stasis	22.54234	2	-40.37879	0.792			0.88294146		0.004585989			9.17E-03
164	95-b	40.95	54667.07	61-a	28.53	34225.31	34.74	44446.19	Stasis	22.57077	2	-40.43566	0.786			0.883227473		0.004552604			9.11E-03
165	93-d	40.43	54011.94	59-c	28.00	33268.76	34.21	43640.35	Stasis	22.66291	2	-40.61995	0.889			0.886799533		0.004410199			8.82E-03
166	93-b	39.93	53378.65	59-a	27.50	32371.99	33.72	42875.32	Stasis	22.79247	2	-40.87906	0.748			0.88707376		0.004362921			8.73E-03
167	85-c	37.74	50605.26	57-c	26.99	31450.81	32.37	41028.04	Stasis	21.58848	2	-38.47108	0.833			0.8915639		0.00511963			1.02E-02
168	85-a	37.23	49939.00	57-a	26.48	30529.64	31.85	40234.32	Stasis	22.35224	2	-39.9986	0.827			0.888167244		0.004600094			9.20E-03
169	83-c	36.76	49085.05	55-b	26.00	29669.88	31.38	39377.47	Punc-1	23.26929	4	-35.87191	0.518			0.878216801	1.004796433	0.004069519	18		8.14E-03
170	83-a	36.25	48170.10	51-d	25.43	28759.12	30.84	38464.61	Stasis	20.22976	2	-35.75365	0.732			0.8930817		0.006103082			1.22E-02
171	81-c	35.79	47346.65	51-b	25.05	28230.15	30.42	37788.40	Stasis	20.1573	2	-35.60871	0.867			0.89251081		0.00619429			1.24E-02
172	81-a	35.30	46462.20	49-d	24.54	27508.83	29.92	36985.51	Stasis	20.06432	2	-35.42276	0.587			0.884852538		0.006281361			1.26E-02
173	75-d	34.80	45547.25	49-b	24.03	26787.51	29.41	36167.38	Stasis	20.88555	2	-37.06521	0.849			0.88801037		0.005649956			1.13E-02
174	75-b	34.36	44754.29	47-d	23.52	26066.19	28.94	35410.24	Stasis	21.3403	2	-37.97473	0.603			0.889379812		0.005322643			1.06E-02
175	73-d	33.89	43900.34	47-b	23.01	25344.87	28.45	34622.61	Stasis	19.90774	2	-35.1096	0.805			0.895484535		0.006346569			1.27E-02
176	73-b	33.51	43229.38	45-d	22.50	24623.55	28.01	33926.46	Stasis	19.29881	2	-33.89173	0.836			0.891945481		0.006857659			1.37E-02
177	71-d	33.04	42375.43	45-b	22.08	24034.47	27.56	33204.95	Stasis	19.46526	2	-34.22463	0.868			0.889656869		0.006848958			1.37E-02
178	71-b	32.70	41765.46	41-a	21.49	23199.94	27.10	32482.70	Stasis	19.6241	2	-34.54231	0.851			0.892423147		0.006770495			1.35E-02
179	69-d	32.28	41010.88	39-c	21.11	22659.95	26.70	31835.42	Stasis	19.41909	2	-34.13229	0.809			0.89014487		0.006965086			1.39E-02
180	69-b	31.87	40263.57	39-a	20.59	21923.61	26.23	31093.59	Stasis	19.4922	2	-34.27851	0.767			0.89157197		0.006929024			1.39E-02
181	67-a	30.91	38529.81	37-c	20.10	21236.35	25.51	29883.08	Stasis	20.90262	2	-37.09936	0.874			0.885974295		0.005859716			1.17E-02
182	63-c	29.95	36796.06	37-a	19.58	20500.00	24.77	28648.03	Stasis	20.77917	2	-36.85247	0.81			0.885046184		0.006036703			1.21E-02
183	63-a	29.49	35959.07	35-c	19.06	19585.41	24.27	27772.24	Stasis	20.4682	2	-36.23051	0.89			0.886237417		0.006263724			1.25E-02
184	61-c	29.01	35092.19	33-c	18.02	17756.23	23.51	26424.21	Stasis	20.33424	2	-35.96261	0.858			0.885030926		0.006450943			1.29E-02
185	61-a	28.53	34225.31	33-a	17.50	16841.64	23.01	25533.48	Stasis	20.38391	2	-36.06194	0.86			0.883181037		0.006422649			1.28E-02
186	59-c	28.00	33268.76	27-d	16.61	15275.77	22.30	24272.26	Punc-1	26.00291	4	-41.33914	0.776			1.004785207	0.870338802	0.003234314	4		6.47E-03
187	59-a	27.50	32371.99	27-b	16.16	14492.83	21.83	23432.41	Stasis	23.16261	2	-41.61933	0.527			0.883702869		0.004668597			9.34E-03
188	57-c	26.99	31450.81	25-d	15.68	13653.97	21.34	22552.39	Stasis	23.34163	2	-41.97737	0.832			0.880759916		0.004613488			9.23E-03
189	57-a	26.48	30529.64	25-b	15.24	12871.04	20.86	21700.34	Stasis	26.52785	2	-48.34982	0.576			0.874673147		0.003100449			6.20E-03
190	55-b	26.00	29669.88	23-d	14.73	11976.25	20.37	20823.07	Stasis	26.02252	2	-47.33917	0.497			0.87918343		0.00337997			6.76E-03
191	51-d	25.43	28759.12	23-b	14.22	11081.47	19.82	19920.29	Punc-1	28.89871	4	-47.13076	0.498			0.80391223	0.898222501	0.002316698	4		4.63E-03
192	51-b	25.05	28230.15	21-c	13.55	10295.71	19.30	19262.93	Stasis	26.39293	2	-48.07997	0.656			0.890439043		0.003259005			6.52E-03
193	49-d	24.54	27508.83	21-a	13.07	9798.26	18.81	18653.54	Stasis	26.99832	2	-49.29075	0.825			0.895121908		0.003033589			6.07E-03
194	49-b	24.03	26787.51	17-d	12.22	8914.05	18.13	17850.78	Stasis	28.73144	2	-52.757	0.886			0.900022079		0.002471253			4.94E-03
195	47-d	23.52	26066.19	17-b	11.84	8519.06	17.68	17292.62	Stasis	32.15412	2	-59.60236	0.794			0.890487066		0.001510432			3.02E-03
196	47-b	23.01	25344.87	15-b	10.81	7441.82	16.91	16393.34	Stasis	34.54717	2	-64.38846	0.883			0.89414669		0.00108626			2.17E-03
197	45-d	22.50	24623.55	13-d	10.33	6908.55	16.41	15766.05	Stasis	34.10858	2	-63.51128	0.829			0.8918118		0.00120762			2.42E-03
198	45-b	22.08	24034.47	13-b	9.78	6386.62	15.93	15210.55	Stasis	34.08475	2	-63.46362	0.882			0.892168289		0.001237807			2.48E-03
199	41-a	21.49	23199.94	11-d	9.29	5929.93	15.39	14564.94	Stasis	34.85109	2	-64.9963	0.897			0.897057775		0.001095096			2.19E-03
200	39-c	21.11	22659.95	11-b	8.74	5408.01	14.93	14033.98	Stasis	34.55438	2	-64.40288	0.907			0.899588318		0.001143453			2.29E-03
201	39-a	20.59	21923.61	9-d	8.22	4918.70	14.41	13421.15	Stasis	34.67394	2	-64.642	0.885			0.899186634		0.001106968			2.21E-03
202	37-c	20.10	21236.35	9-b	7.74	4462.01	13.92	12849.18	Stasis	35.5234	2	-66.34092	0.826			0.905453602		0.000951425			1.90E-03
203	37-a	19.58	20500.00	7-a	6.33	3130.00	12.96	11815.00	Stasis	38.38313	2	-72.06037	0.569			0.900414823		0.000516842			1.03E-03
204	35-c	19.06	19585.41	5-c	5.67	2499.34	12.36	11042.37	URW	39.88606	1	-77.54991	0.506		0							0.00E+00
205	33-c	18.02	17756.23	5-a	4.92	1789.84	11.47	9773.03	URW	40.4668	1	-78.71139	0.585		0							0.00E+00
206	33-a	17.50	16841.64	3-c	4.25	1159.17	10.88	9000.41	URW	40.5619	1	-78.90158	0.602		0							0.00E+00
207	27-d	16.61	15275.77	3-a	3.58	528.51	10.10	7902.14	URW	38.86836	1	-75.51451	0.625		0							0.00E+00
208	27-b	16.16	14492.83	1-a	2.50	-496.32	9.33	6998.25	URW	38.37798	1	-74.53373	0.507		0							0.00E+00
